# Supplementary material for: Metabolic modulation regulates cardiac wall morphogenesis in zebrafish
Source: eLife journal article supplement (doi:10.7554/elife.50161), 2019-12-21
Supplement: supp [file elife-50161-supp-v1.zip]

Archive with 11 entries (11 files):
- elife_poa_e50161_Figure_1_figure_supplement_1.tif
- elife_poa_e50161_Figure_4_figure_supplement_1.tif
- elife_poa_e50161_Figure_1_video_2.mp4
- elife_poa_e50161_Figure_2_source_data_1.docx
- elife_poa_e50161_Figure_3_figure_supplement_1.tif
- elife_poa_e50161_Figure_2_source_data_3.docx
- elife_poa_e50161_Figure_2_source_data_2.docx
- elife_poa_e50161_Figure_2_figure_supplement_2.tif
- elife_poa_e50161_Transparent_Reporting_File.pdf
- elife_poa_e50161_Figure_2_figure_supplement_1.tif
- elife_poa_e50161_Figure_1_video_1.mp4
