# Supplementary figures and images for: Metabolic modulation regulates cardiac wall morphogenesis in zebrafish
Source: eLife journal article supplement (doi:10.7554/elife.50161), 2019-12-21

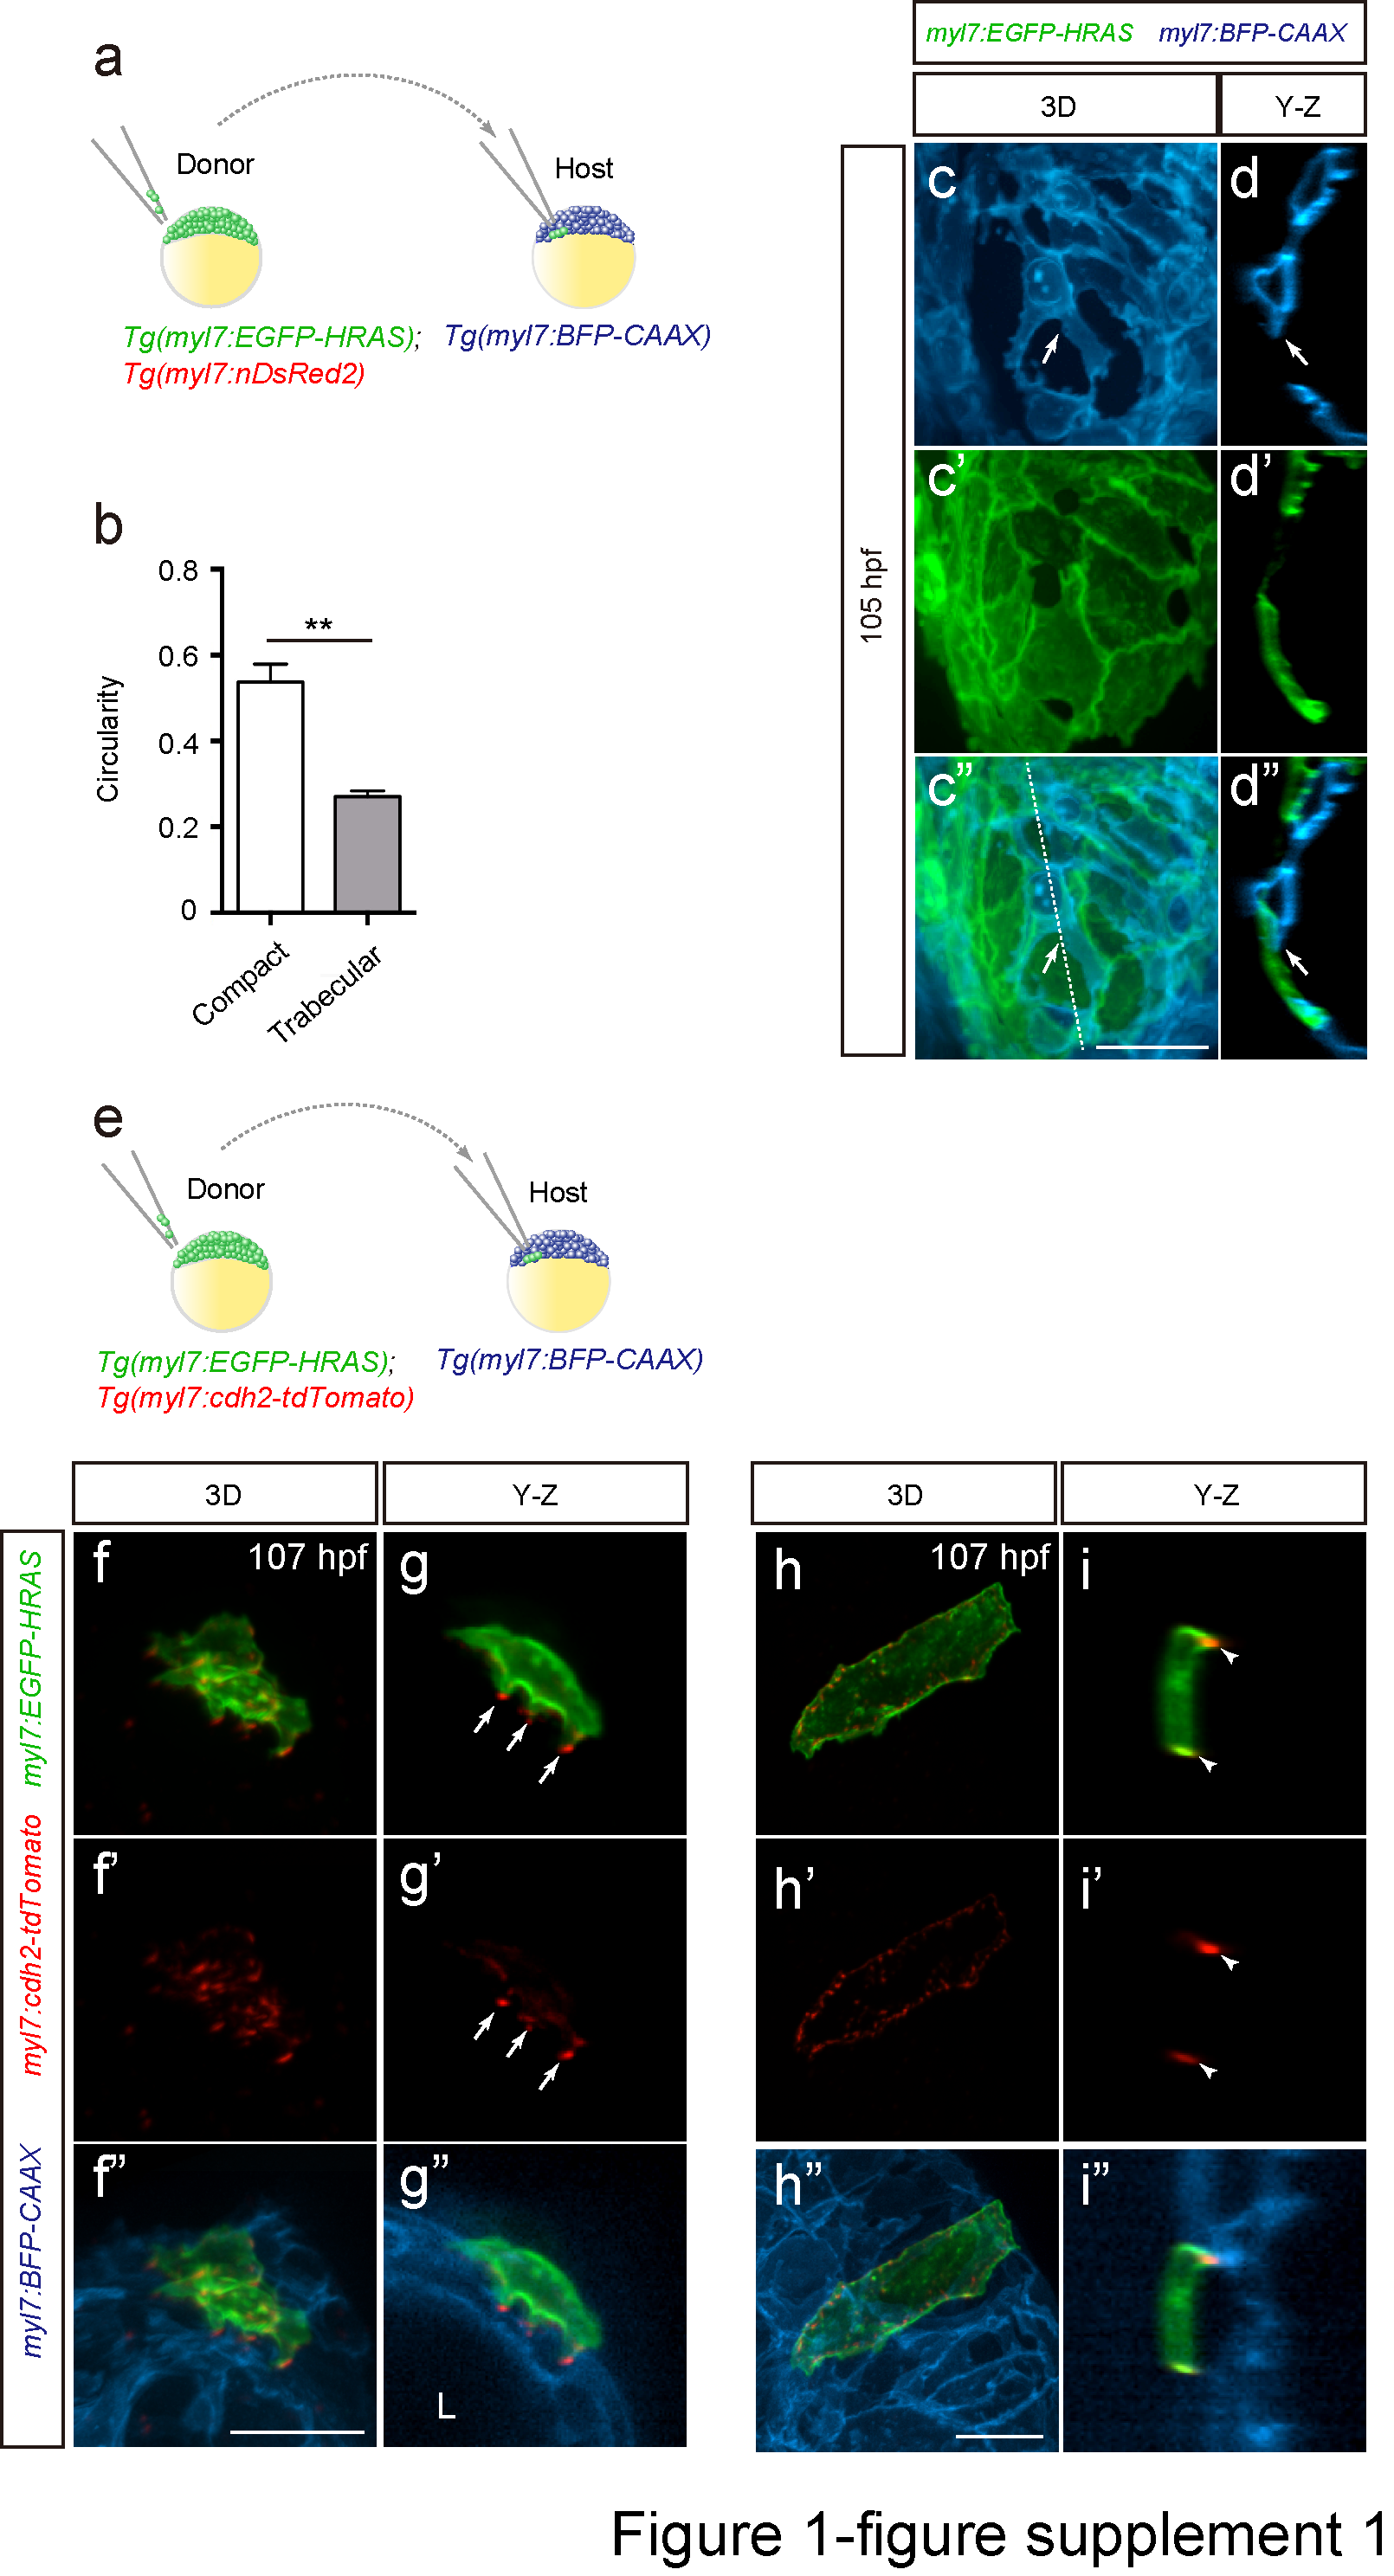

Supplement: supp [file elife-50161-supp-v1.zip › elife_poa_e50161_Figure_1_figure_supplement_1.tif]

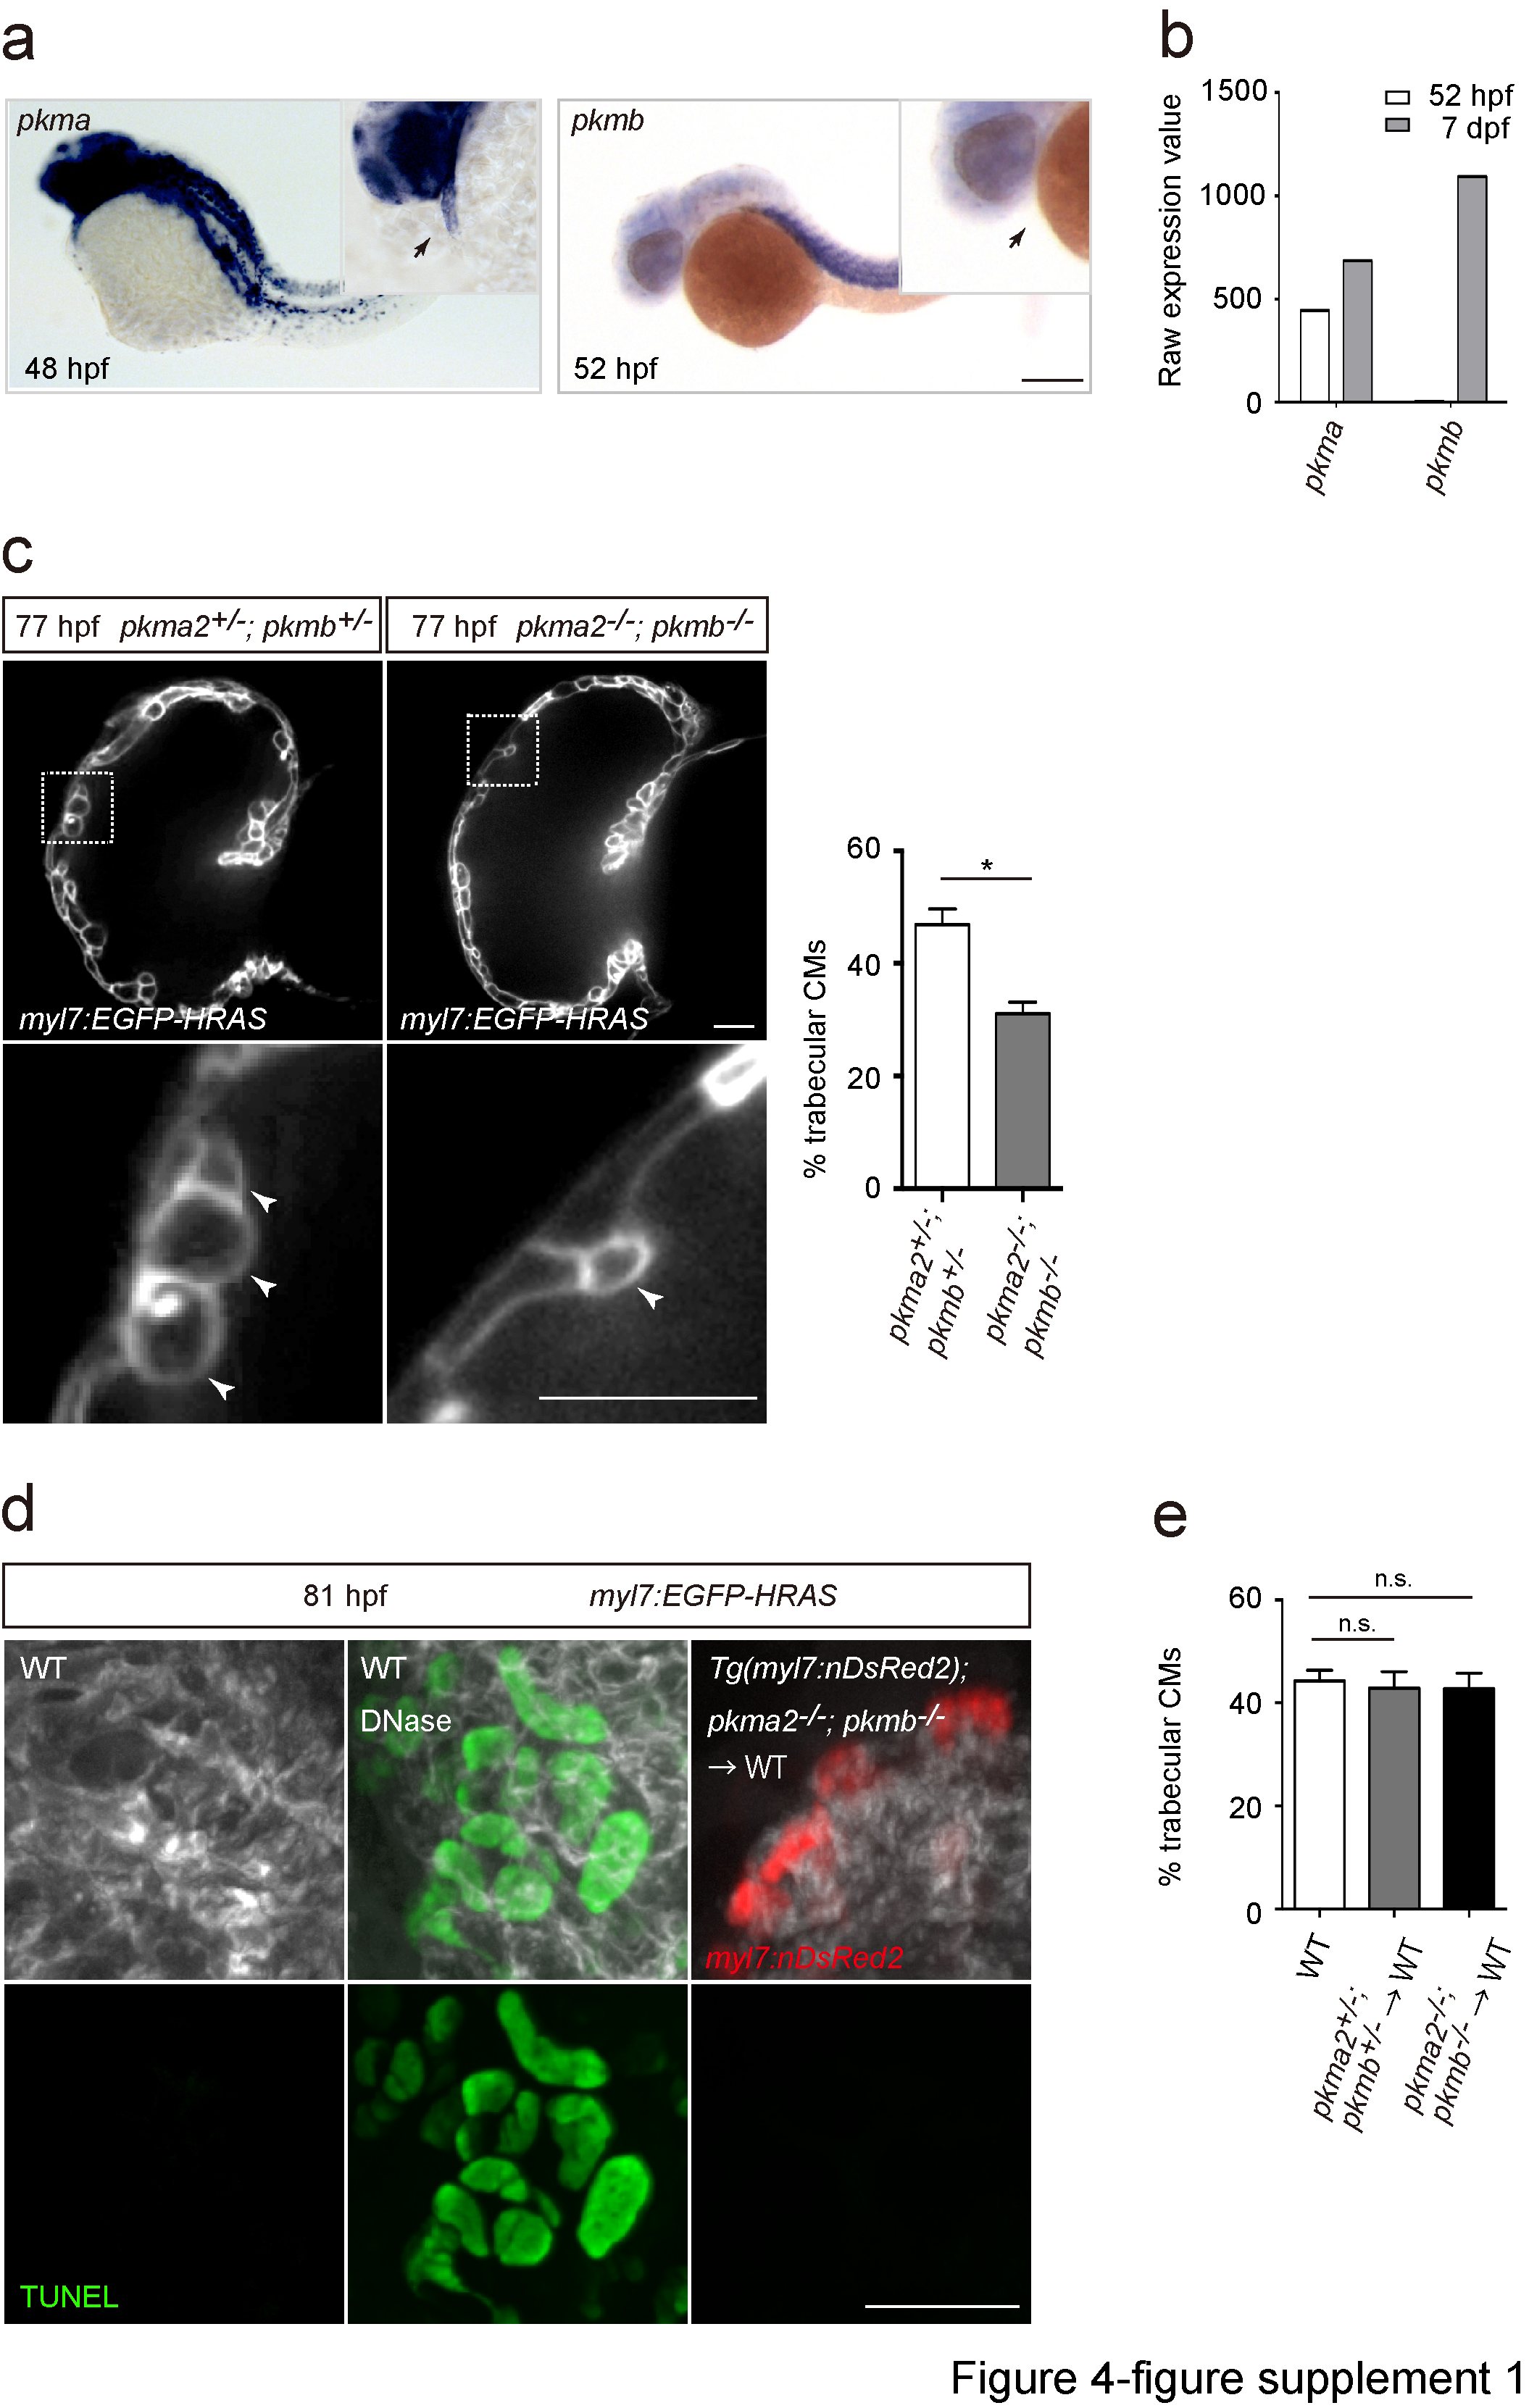

Supplement: supp [file elife-50161-supp-v1.zip › elife_poa_e50161_Figure_4_figure_supplement_1.tif]

**Supplementary Table 1 – Mass spectrometry data.**


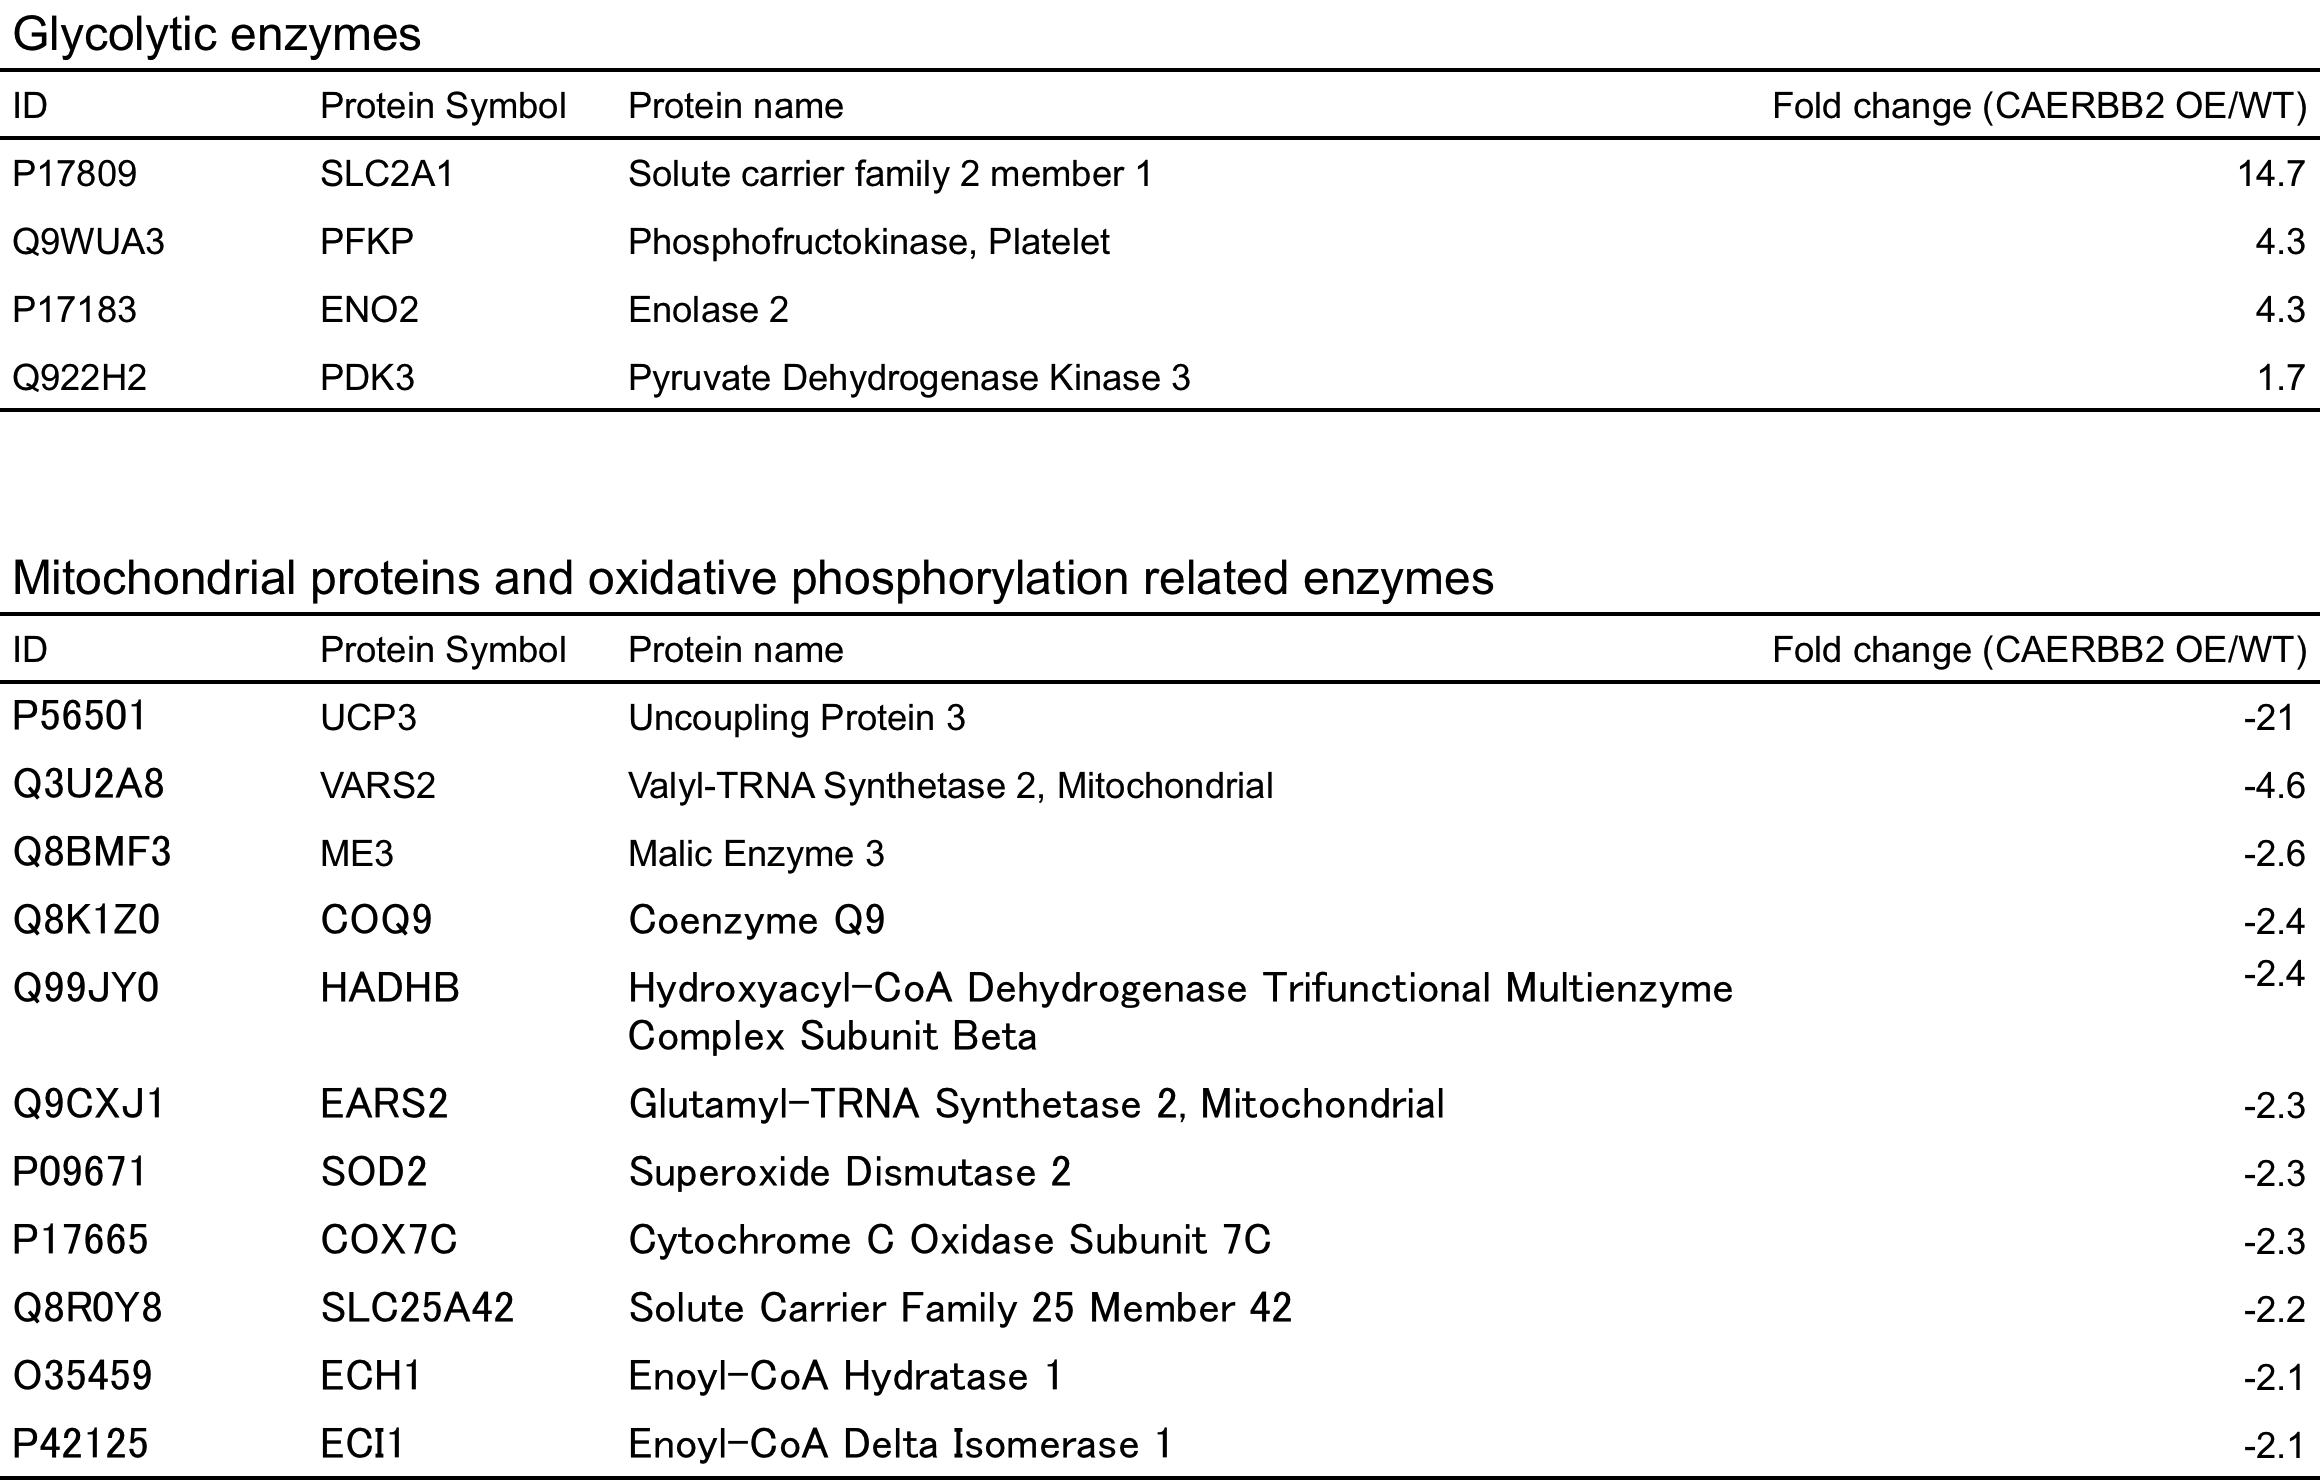

Supplement: supp [file elife-50161-supp-v1.zip › elife_poa_e50161_Figure_2_source_data_1.docx]

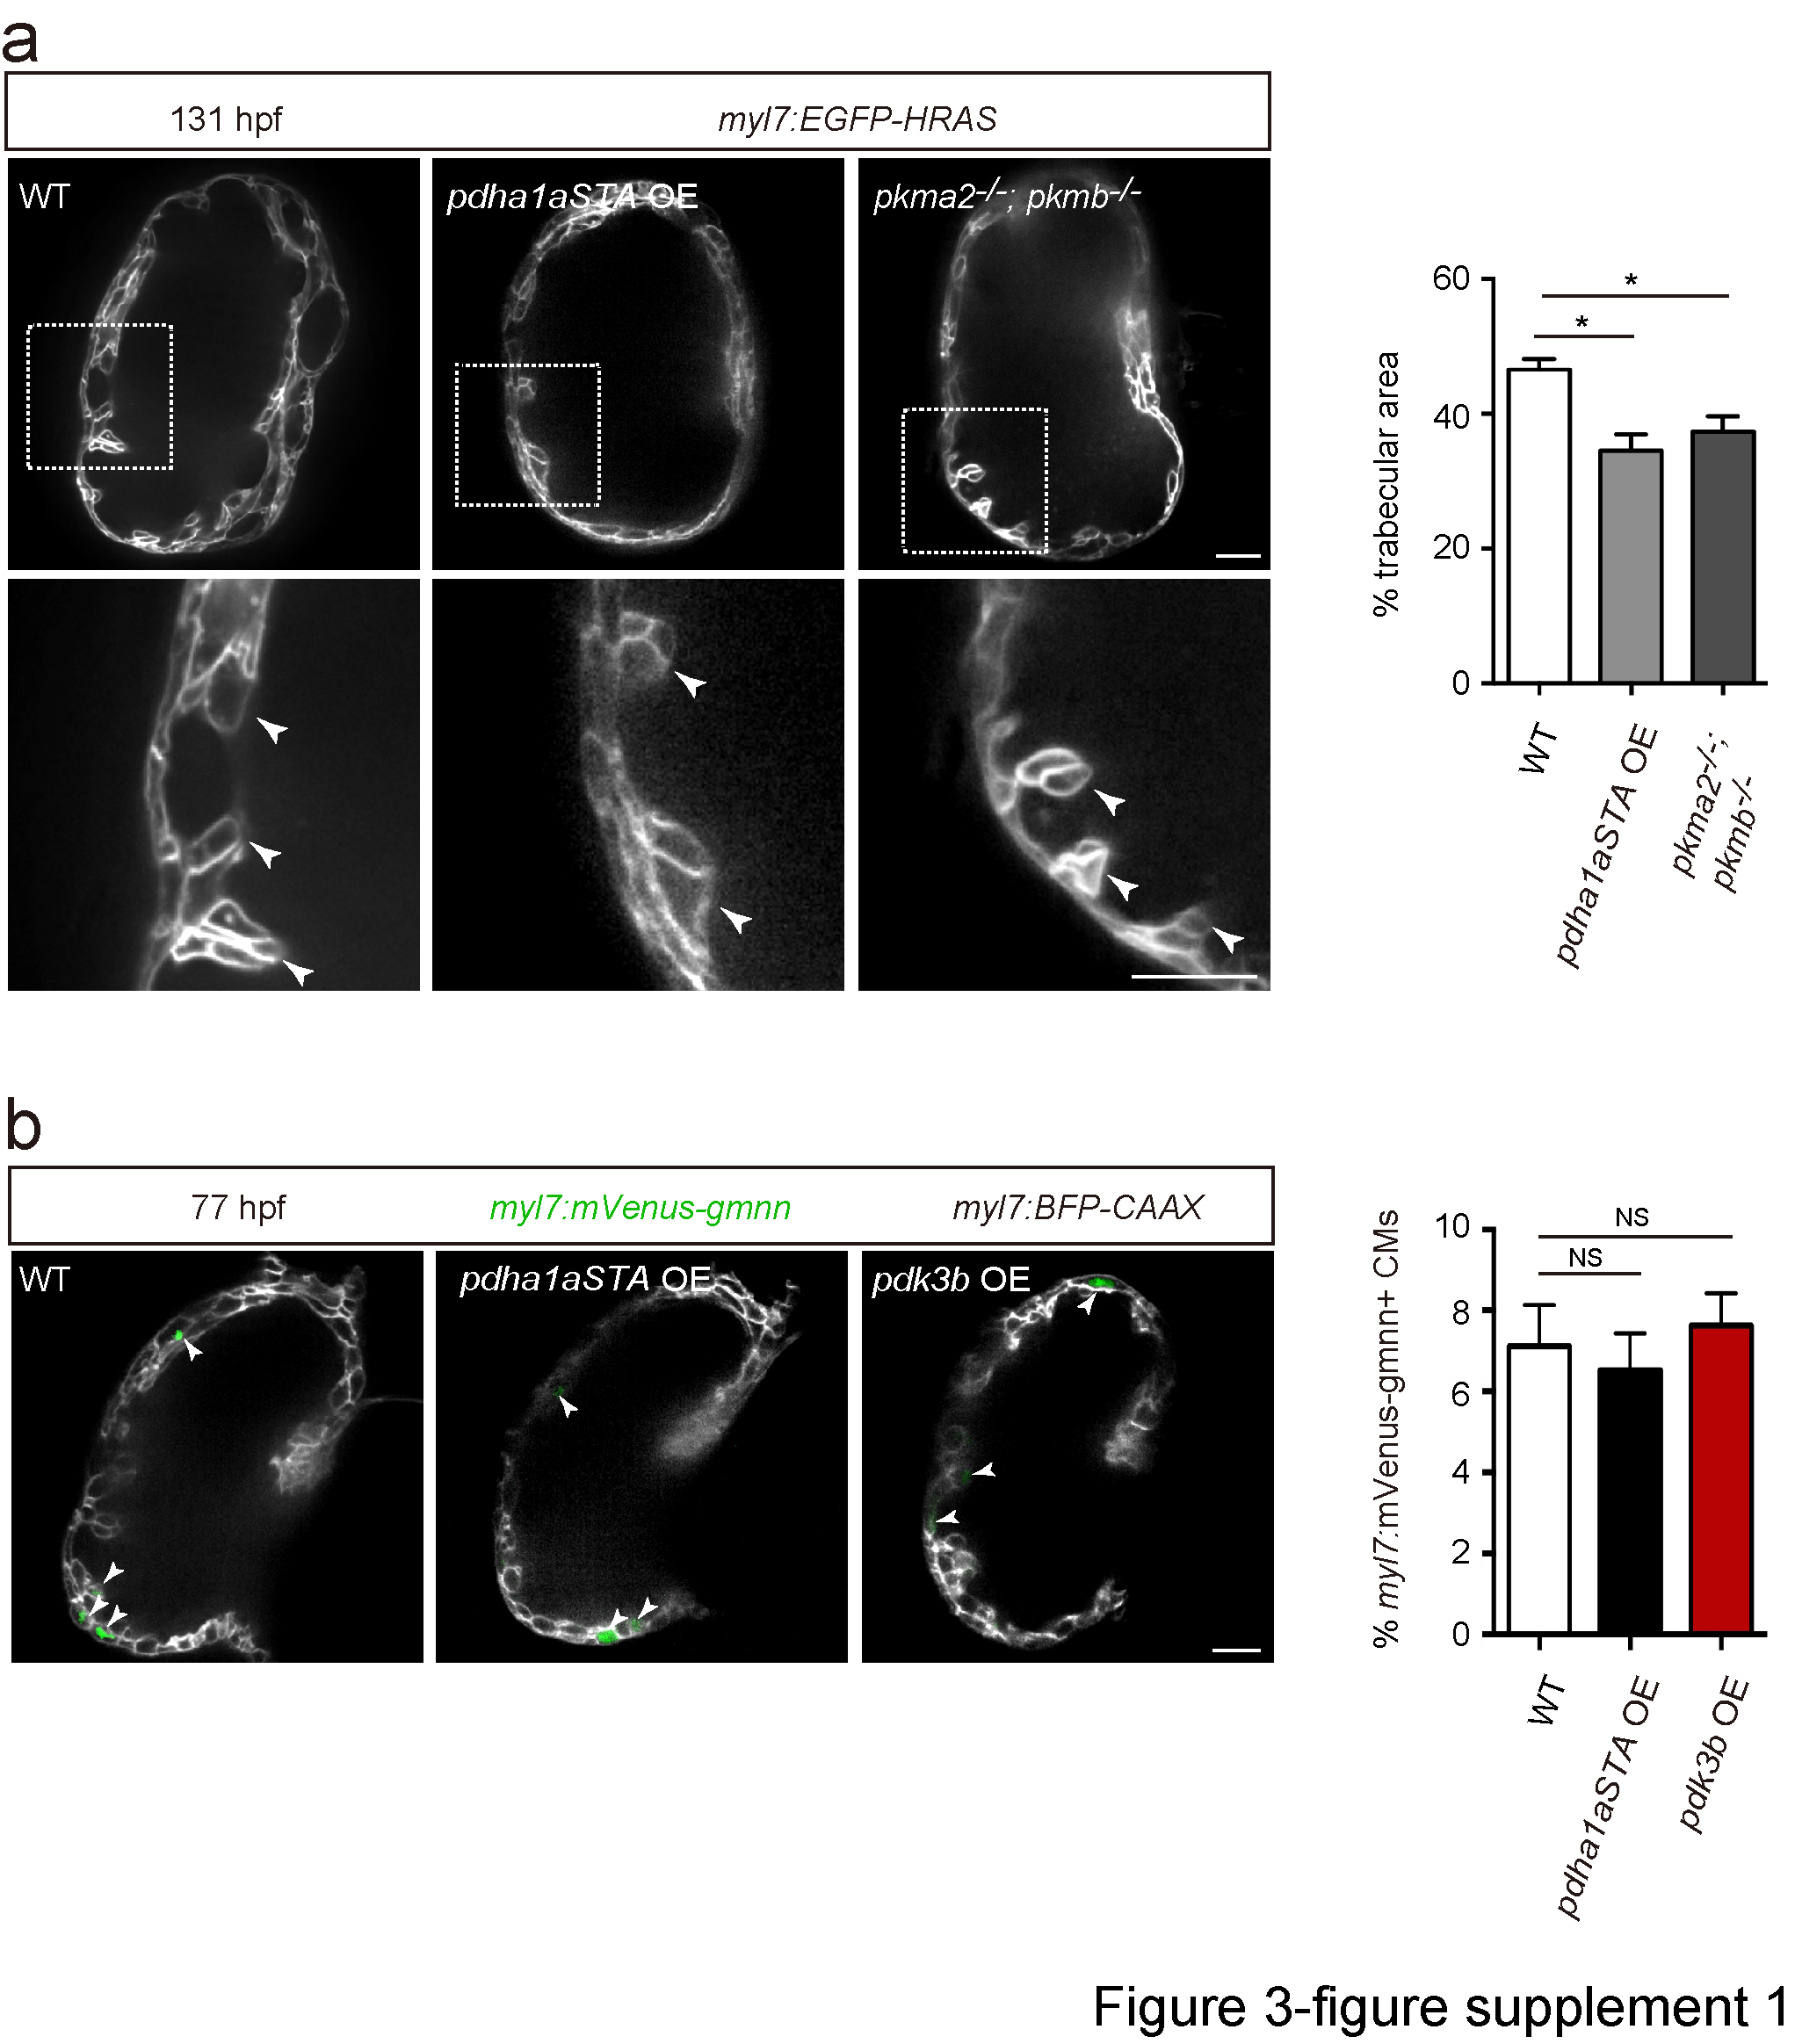

Supplement: supp [file elife-50161-supp-v1.zip › elife_poa_e50161_Figure_3_figure_supplement_1.tif]

**Supplementary Table 3 – Mean Ct values of qPCR analysis in Figures 2a and 2e.**


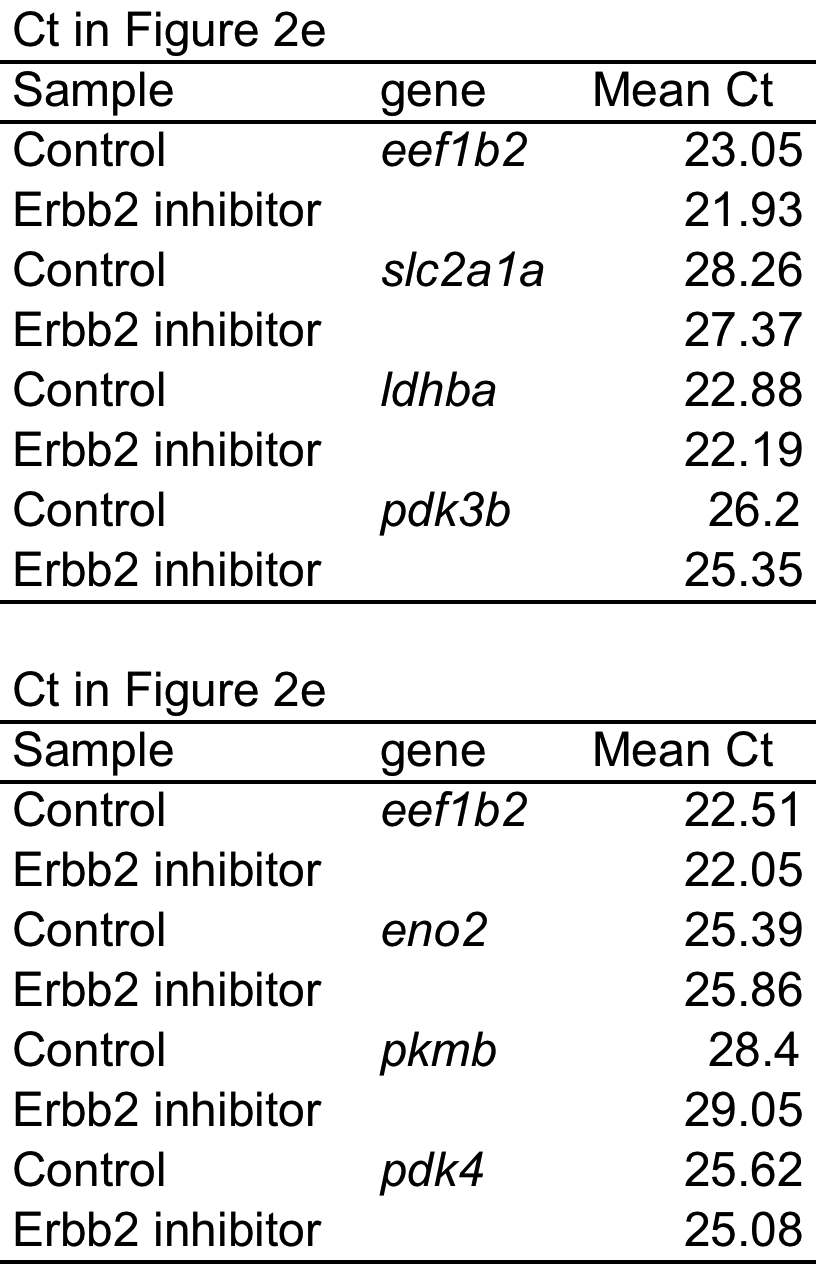

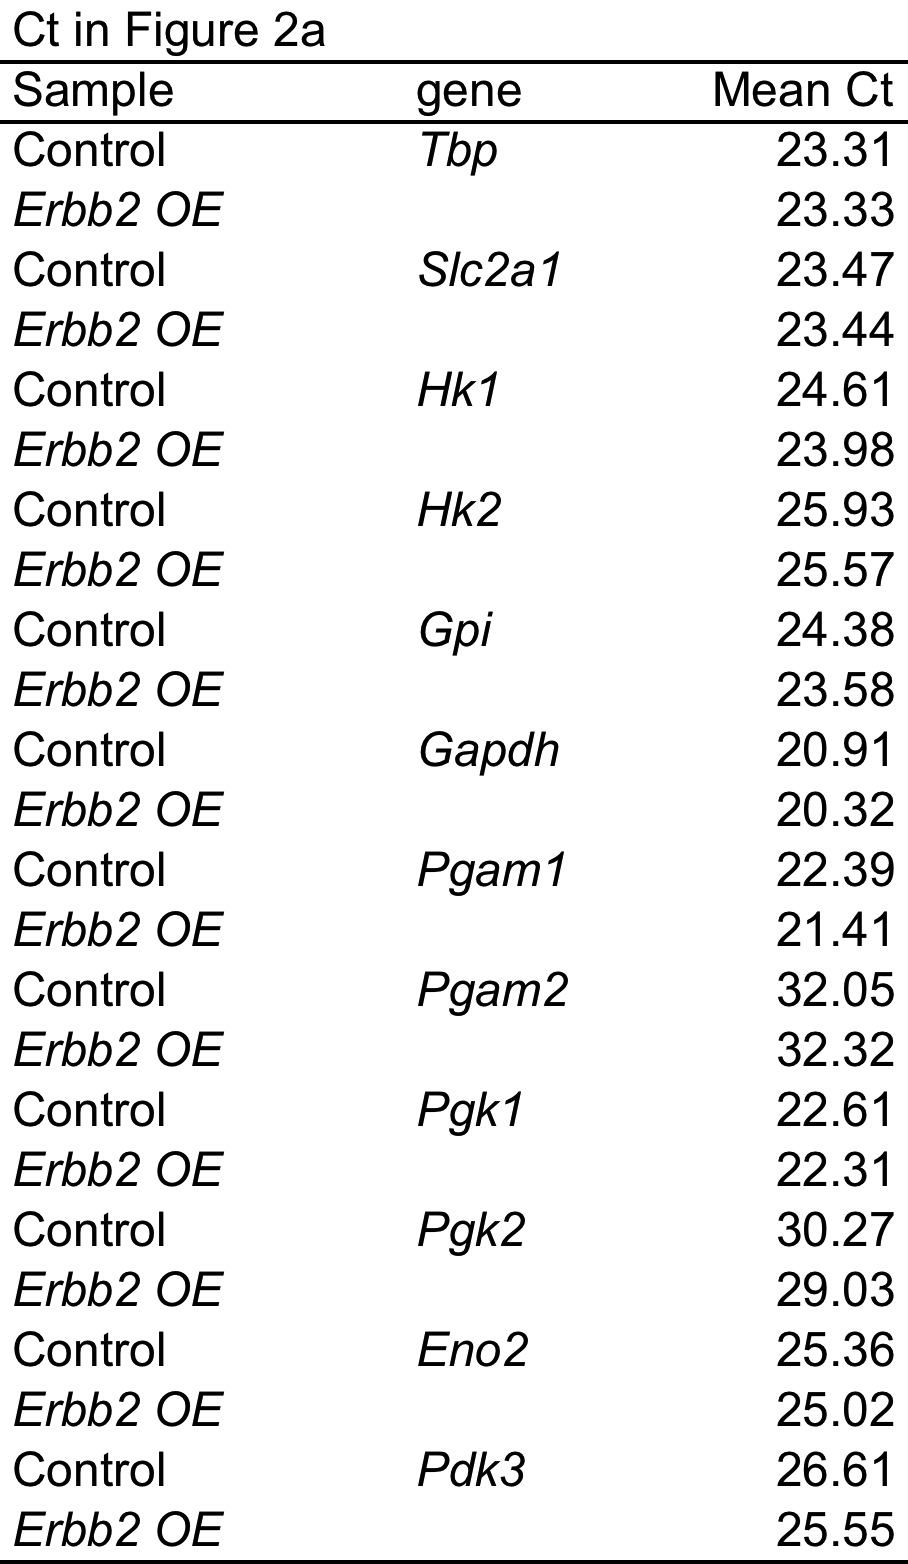

Supplement: supp [file elife-50161-supp-v1.zip › elife_poa_e50161_Figure_2_source_data_3.docx]

**Supplementary Table 2 – Primer sequences for qPCR analysis.**


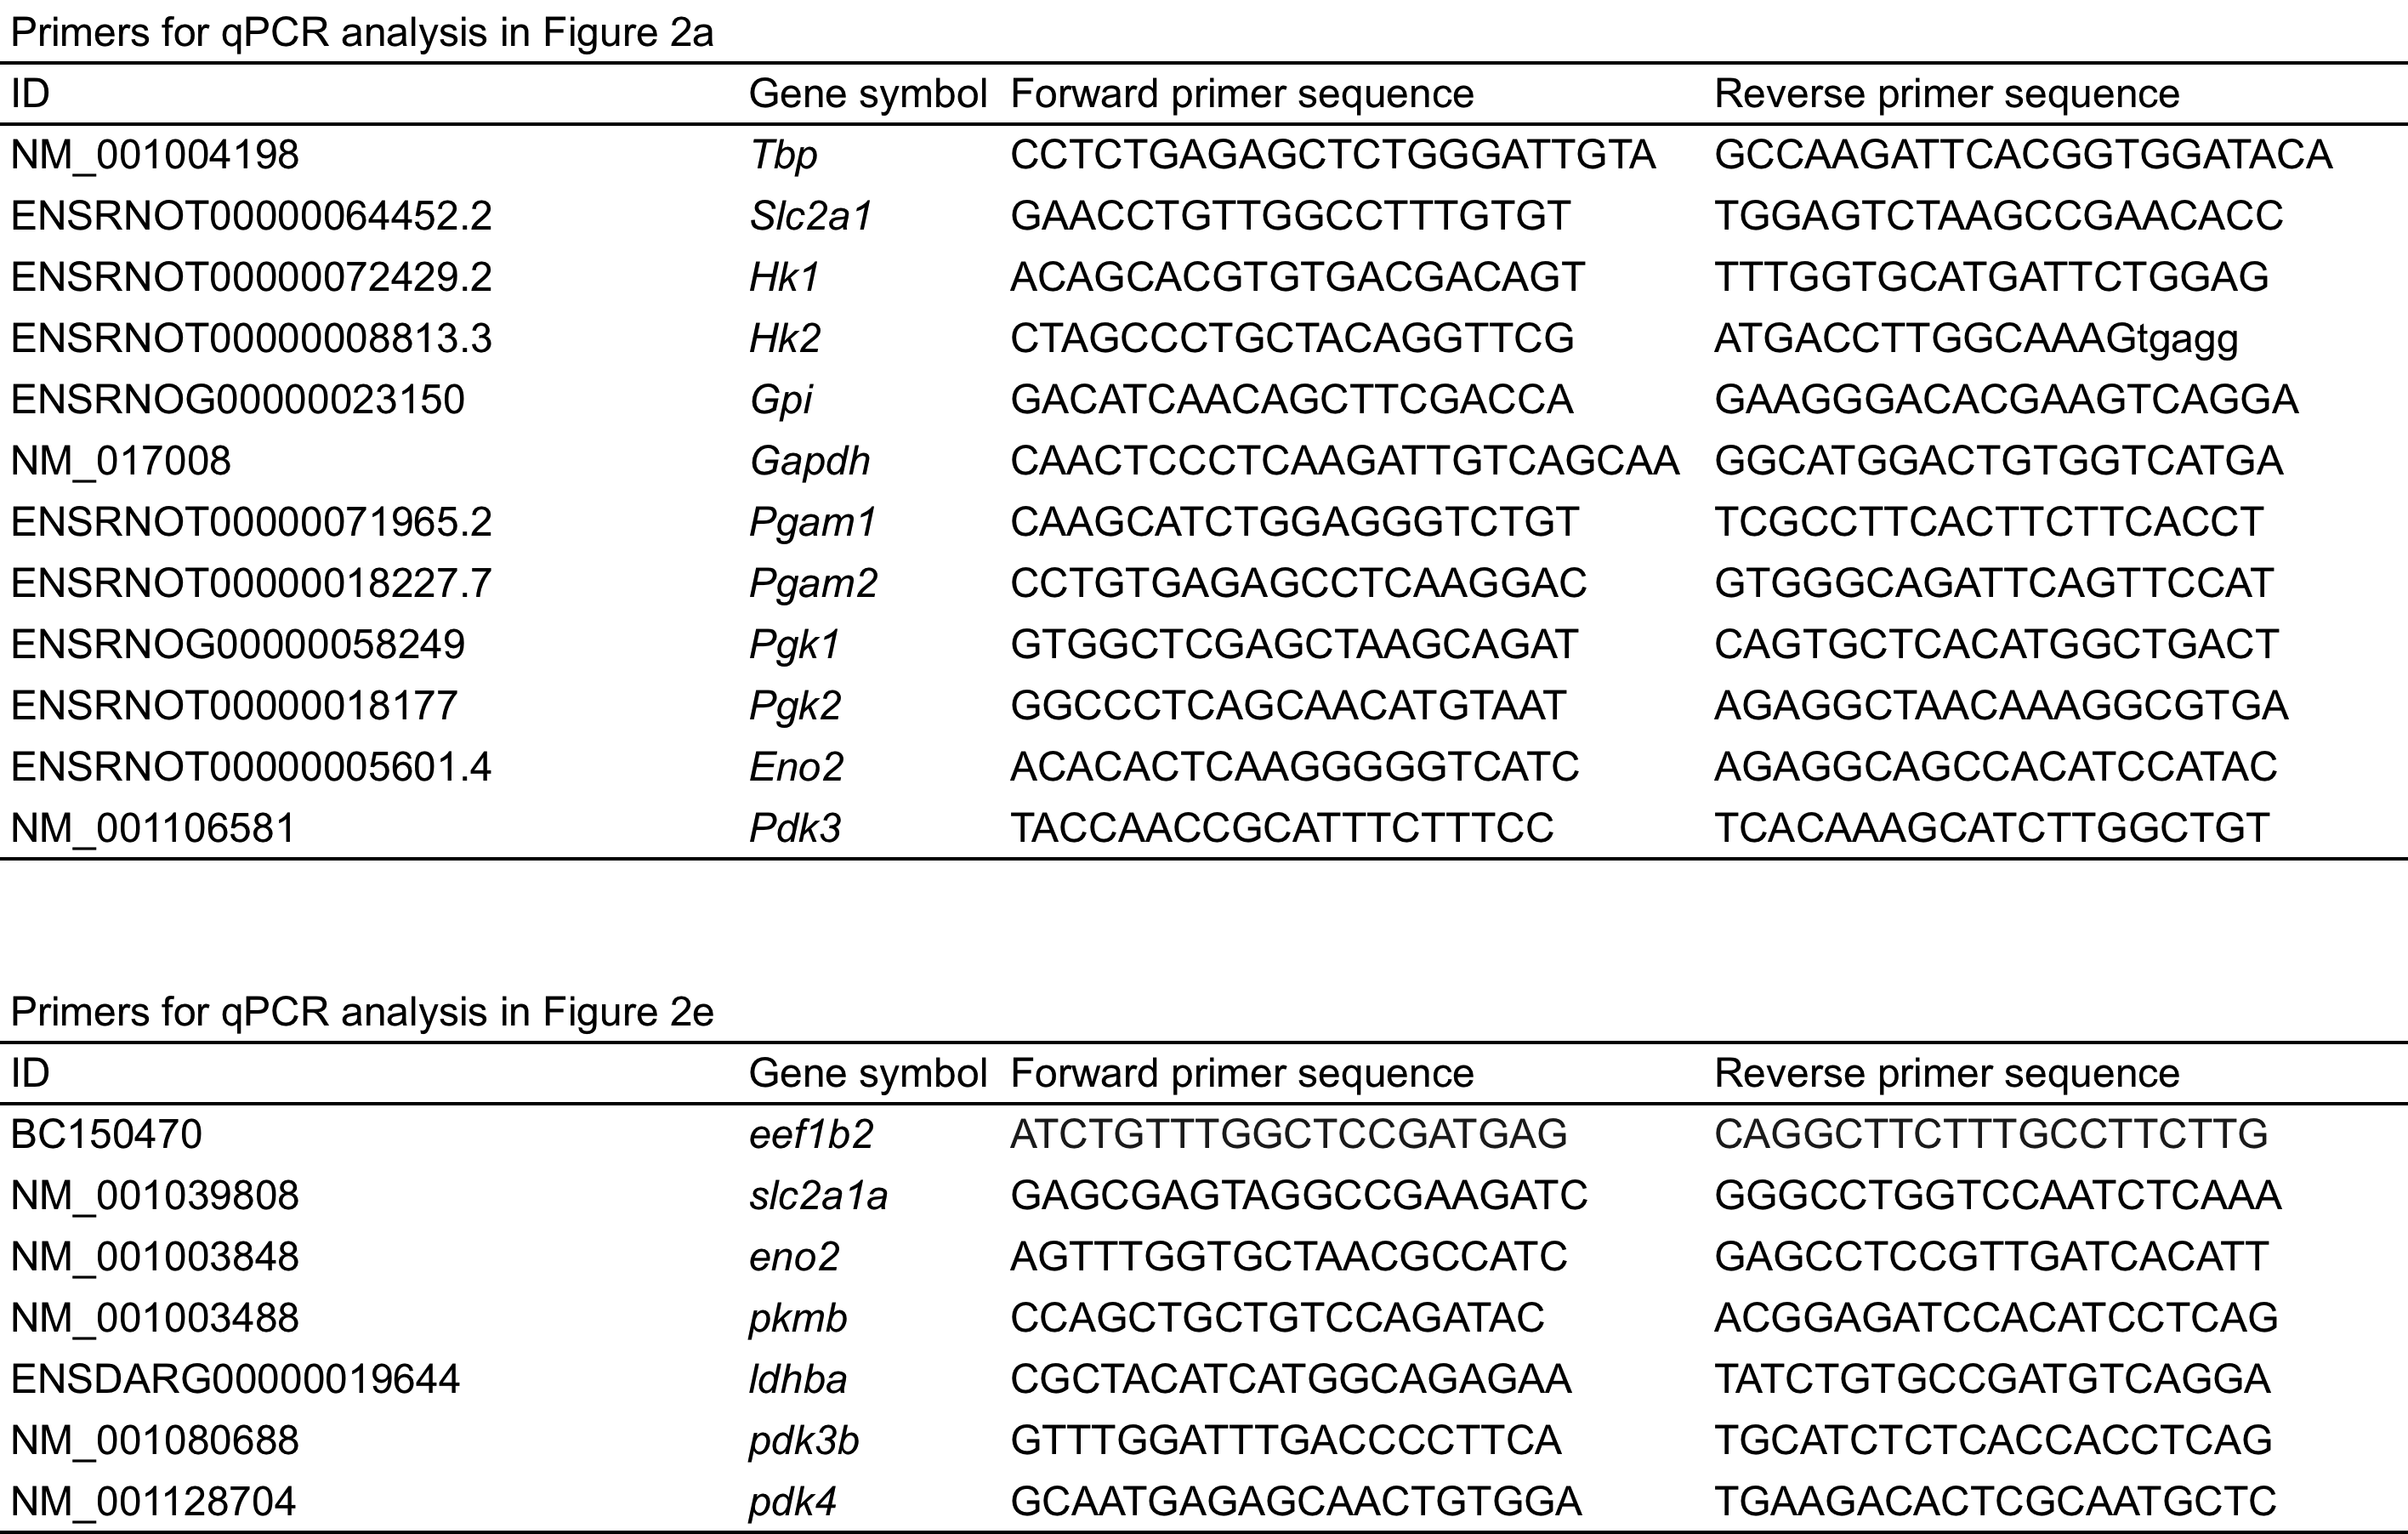

Supplement: supp [file elife-50161-supp-v1.zip › elife_poa_e50161_Figure_2_source_data_2.docx]

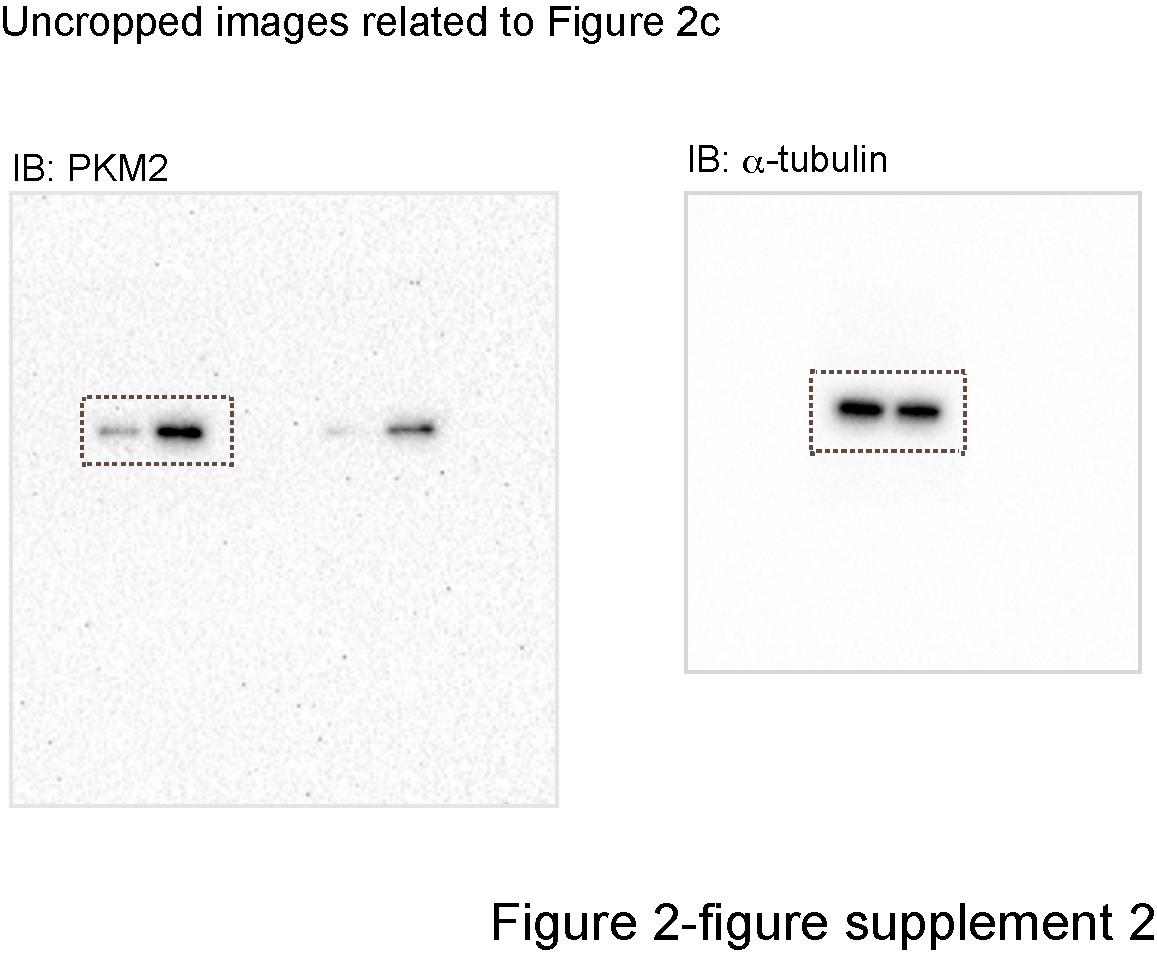

Supplement: supp [file elife-50161-supp-v1.zip › elife_poa_e50161_Figure_2_figure_supplement_2.tif]

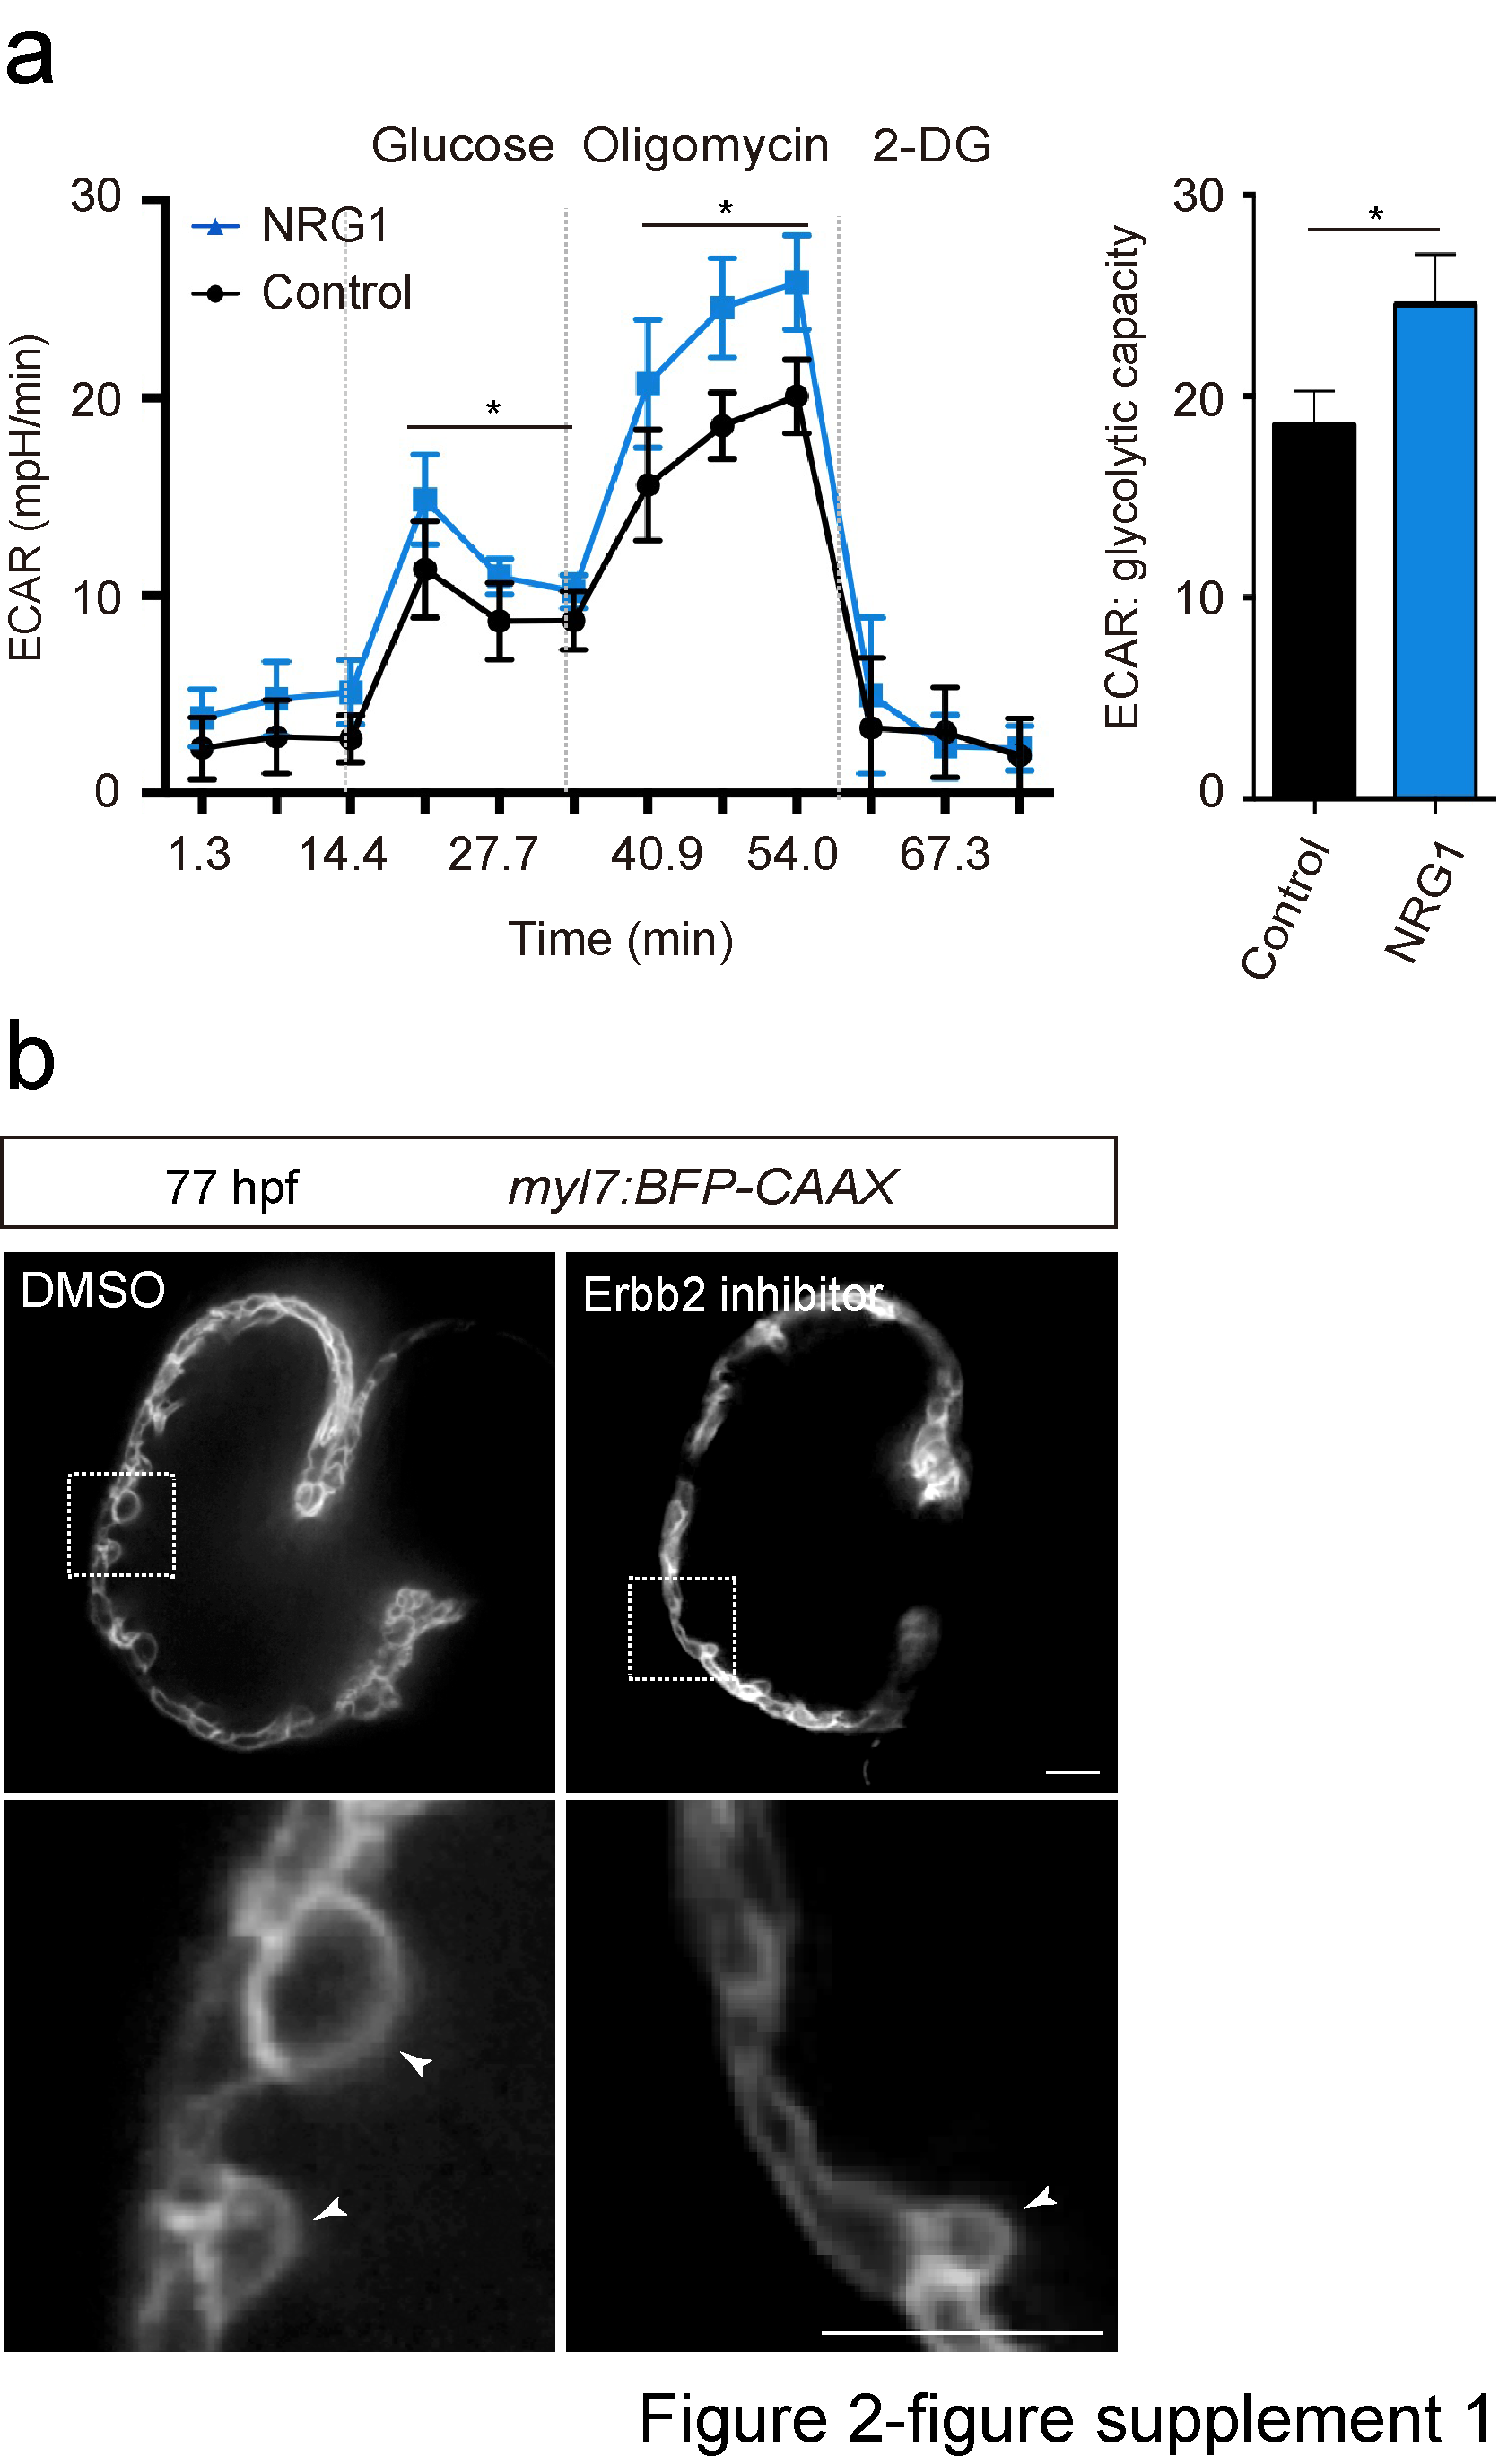

Supplement: supp [file elife-50161-supp-v1.zip › elife_poa_e50161_Figure_2_figure_supplement_1.tif]
